# Supplementary material for: Impact of Core-Forming Segment Structure on Drug Loading in Biodegradable Polymeric Micelles Using PEG-b-Poly(lactide-co-depsipeptide) Block Copolymers
Source: Hindawi journal article supplement (doi:10.1155/2014/579212), 2014-01-01
Supplement: f1 [file 579212.f1.pdf]

## Supporting Information

### **Impact of Core-forming Segment Structure on Drug Loading in Biodegradable Polymeric Micelles Using PEG-*b*-Poly(lactide-*co*-depsipeptide) Block Copolymers**

Akihiro Takahashi<sup>1</sup>, Yuta Ozaki<sup>2</sup>, Akinori Kuzuya<sup>1,2</sup>, Yuichi Ohya<sup>1,2\*</sup>

#### **Synthesis of PEG-*b*-PLGL<sub>20</sub> (20% mole fraction of Leu)**

PEG (525 mg, 110  $\mu$ mol), L-LA (484 mg, 3.40 mmol), cyclo(Glc-Leu) (114 mg, 0.800 mmol), tin 2-ethylhexanoate (1.70 mg, 4.20  $\mu$ mol), Yield = 84%.

<sup>1</sup>H NMR (400 MHz, CDCl<sub>3</sub>):  $\delta$  = 0.75-1.06 (br, CH<sub>2</sub>CH(CH<sub>3</sub>)<sub>2</sub>), 1.45-1.63 (m, COCH(O)CH<sub>3</sub>), 1.63-1.83 (br, CHCH<sub>2</sub>CH and CH<sub>2</sub>CH(CH<sub>3</sub>)<sub>2</sub>), 3.38 (s, CH<sub>3</sub>O), 3.52-3.80 (m, CH<sub>3</sub>O(CH<sub>2</sub>CH<sub>2</sub>O)<sub>m</sub>CH<sub>2</sub>CH<sub>2</sub>), 4.06-4.91 (br, OCH<sub>2</sub>CH<sub>2</sub>OCO, COCH(CH<sub>2</sub>)NH and NHCOCH<sub>2</sub>O), 5.01-5.26 (m, OCOCH(CH<sub>3</sub>)O)

#### **Synthesis of PEG-*b*-PLGL<sub>37</sub> (37% mole fraction of Leu)**

PEG (420 mg, 84.0  $\mu$ mol), L-LA (363 mg, 2.50 mmol), cyclo(Glc-Leu) (284 mg, 1.70 mmol), tin 2-ethylhexanoate (1.70 mg, 4.20  $\mu$ mol), Yield = 74%.

<sup>1</sup>H NMR (400 MHz, CDCl<sub>3</sub>):  $\delta$  = 0.75-1.06 (br, CH<sub>2</sub>CH(CH<sub>3</sub>)<sub>2</sub>), 1.45-1.63 (m, COCH(O)CH<sub>3</sub>), 1.63-1.83 (br, CHCH<sub>2</sub>CH and CH<sub>2</sub>CH(CH<sub>3</sub>)<sub>2</sub>), 3.38 (s, CH<sub>3</sub>O), 3.52-3.80 (m, CH<sub>3</sub>O(CH<sub>2</sub>CH<sub>2</sub>O)<sub>m</sub>CH<sub>2</sub>CH<sub>2</sub>), 4.06-4.91 (br, OCH<sub>2</sub>CH<sub>2</sub>OCO, COCH(CH<sub>2</sub>)NH and NHCOCH<sub>2</sub>O), 5.01-5.26 (m, OCOCH(CH<sub>3</sub>)O)

### Synthesis of PEG-*b*-PLGL<sub>59</sub> (59% mole fraction of Leu)

PEG (350 mg, 70.0  $\mu$ mol), L-LA (242 mg, 1.70 mmol), cyclo(Glc-Leu) (431 mg, 2.50 mmol), tin 2-ethylhexanoate (1.70 mg, 4.20  $\mu$ mol), Yield = 72%.

<sup>1</sup>H NMR (400 MHz, CDCl<sub>3</sub>):  $\delta$  = 0.75-1.06 (br, CH<sub>2</sub>CH(CH<sub>3</sub>)<sub>2</sub>), 1.45-1.63 (m, COCH(O)CH<sub>3</sub>), 1.63-1.83 (br, CHCH<sub>2</sub>CH and CH<sub>2</sub>CH(CH<sub>3</sub>)<sub>2</sub>), 3.38 (s, CH<sub>3</sub>O), 3.52-3.80 (m, CH<sub>3</sub>O(CH<sub>2</sub>CH<sub>2</sub>O)<sub>m</sub>CH<sub>2</sub>CH<sub>2</sub>), 4.06-4.91 (br, OCH<sub>2</sub>CH<sub>2</sub>OCO, COCH(CH<sub>2</sub>)NH and NHCOCH<sub>2</sub>O), 5.01-5.26 (m, OCOCH(CH<sub>3</sub>)O)

### Synthesis of PEG-*b*-PLGL<sub>75</sub> (75% mole fraction of Leu)

PEG (150 mg, 30.0  $\mu$ mol), L-LA (61.0 mg, 0.42 mmol), cyclo(Glc-Leu) (216 mg, 1.30 mmol), tin 2-ethylhexanoate (0.68 mg, 1.70  $\mu$ mol), Yield = 76%.

<sup>1</sup>H NMR (400 MHz, CDCl<sub>3</sub>):  $\delta$  = 0.75-1.06 (br, CH<sub>2</sub>CH(CH<sub>3</sub>)<sub>2</sub>), 1.45-1.63 (m, COCH(O)CH<sub>3</sub>), 1.63-1.83 (br, CHCH<sub>2</sub>CH and CH<sub>2</sub>CH(CH<sub>3</sub>)<sub>2</sub>), 3.38 (s, CH<sub>3</sub>O), 3.52-3.80 (m, CH<sub>3</sub>O(CH<sub>2</sub>CH<sub>2</sub>O)<sub>m</sub>CH<sub>2</sub>CH<sub>2</sub>), 4.06-4.91 (br, OCH<sub>2</sub>CH<sub>2</sub>OCO, COCH(CH<sub>2</sub>)NH and NHCOCH<sub>2</sub>O), 5.01-5.26 (m, OCOCH(CH<sub>3</sub>)O)

### Synthesis of PEG-*b*-PLGF<sub>24</sub> (24% mole fraction of Phe)

PEG (600 mg, 120  $\mu$ mol), L-LA (552 mg, 3.80 mmol), cyclo(Glc-Phe) (248 mg, 1.20 mmol), tin 2-ethylhexanoate (2.04 mg, 5.00  $\mu$ mol), Yield = 80%.

<sup>1</sup>H NMR (400 MHz, CDCl<sub>3</sub>):  $\delta$  = 1.41-1.66 (m, COCH(O)CH<sub>3</sub>), 3.00-3.35 (m, CHCH<sub>2</sub>C), 3.38 (s, CH<sub>3</sub>O), 3.43-3.75 (m, CH<sub>3</sub>O(CH<sub>2</sub>CH<sub>2</sub>O)<sub>m</sub>CH<sub>2</sub>CH<sub>2</sub>), 4.16-4.97 (br, OCH<sub>2</sub>CH<sub>2</sub>OCO, COCH(CH<sub>2</sub>)NH and NHCOCH<sub>2</sub>O), 4.98-5.28 (m, OCOCH(CH<sub>3</sub>)O), 7.05-7.40 (br, C<sub>6</sub>H<sub>5</sub>).

### Synthesis of PEG-*b*-PLGF<sub>73</sub> (73% mole fraction of Phe)

PEG (200 mg, 40.0  $\mu\text{mol}$ ), L-LA (103 mg, 0.72 mmol), cyclo(Glc-Phe) (312 mg, 1.50 mmol), tin 2-ethylhexanoate (0.91 mg, 2.20  $\mu\text{mol}$ ), Yield = 50%.

$^1\text{H}$  NMR (400 MHz,  $\text{CDCl}_3$ ):  $\delta$  = 1.41-1.66 (m,  $\text{COCH}(\text{O})\text{CH}_3$ ), 3.00-3.35 (m,  $\text{CHCH}_2\text{C}$ ), 3.38 (s,  $\text{CH}_3\text{O}$ ), 3.43-3.75 (m,  $\text{CH}_3\text{O}(\text{CH}_2\text{CH}_2\text{O})_m\text{CH}_2\text{CH}_2$ ), 4.16-4.97 (br,  $\text{OCH}_2\text{CH}_2\text{OCO}$ ,  $\text{COCH}(\text{CH}_2)\text{NH}$  and  $\text{NHCOCH}_2\text{O}$ ), 4.98-5.28 (m,  $\text{OCOCH}(\text{CH}_3)\text{O}$ ), 7.05-7.40 (br,  $\text{C}_6\text{H}_5$ ).

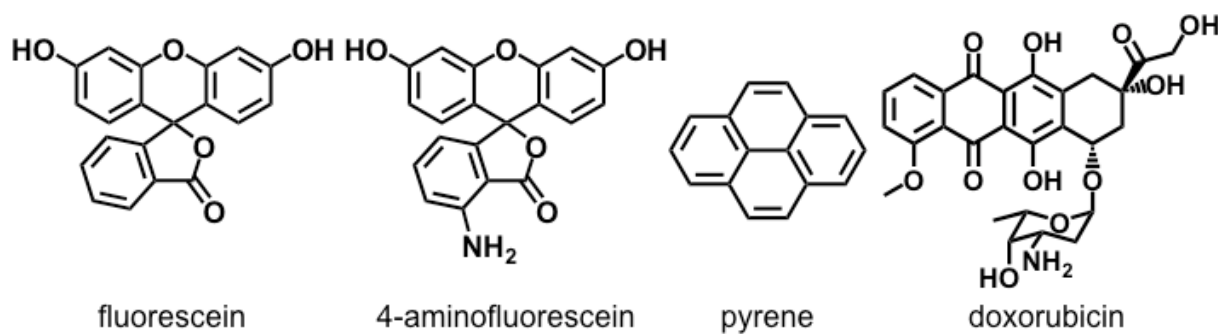

**Figure S1.** Structure of model drugs used in this study.
